# Supplementary material for: Role of protein arginine methyltransferase 5 in group 3 (MYC-driven) Medulloblastoma
Source: Springer Nature journal article supplement (doi:10.1186/s12885-019-6291-z), 2019-11-06
Supplement: MOESM1 [file 17356972]

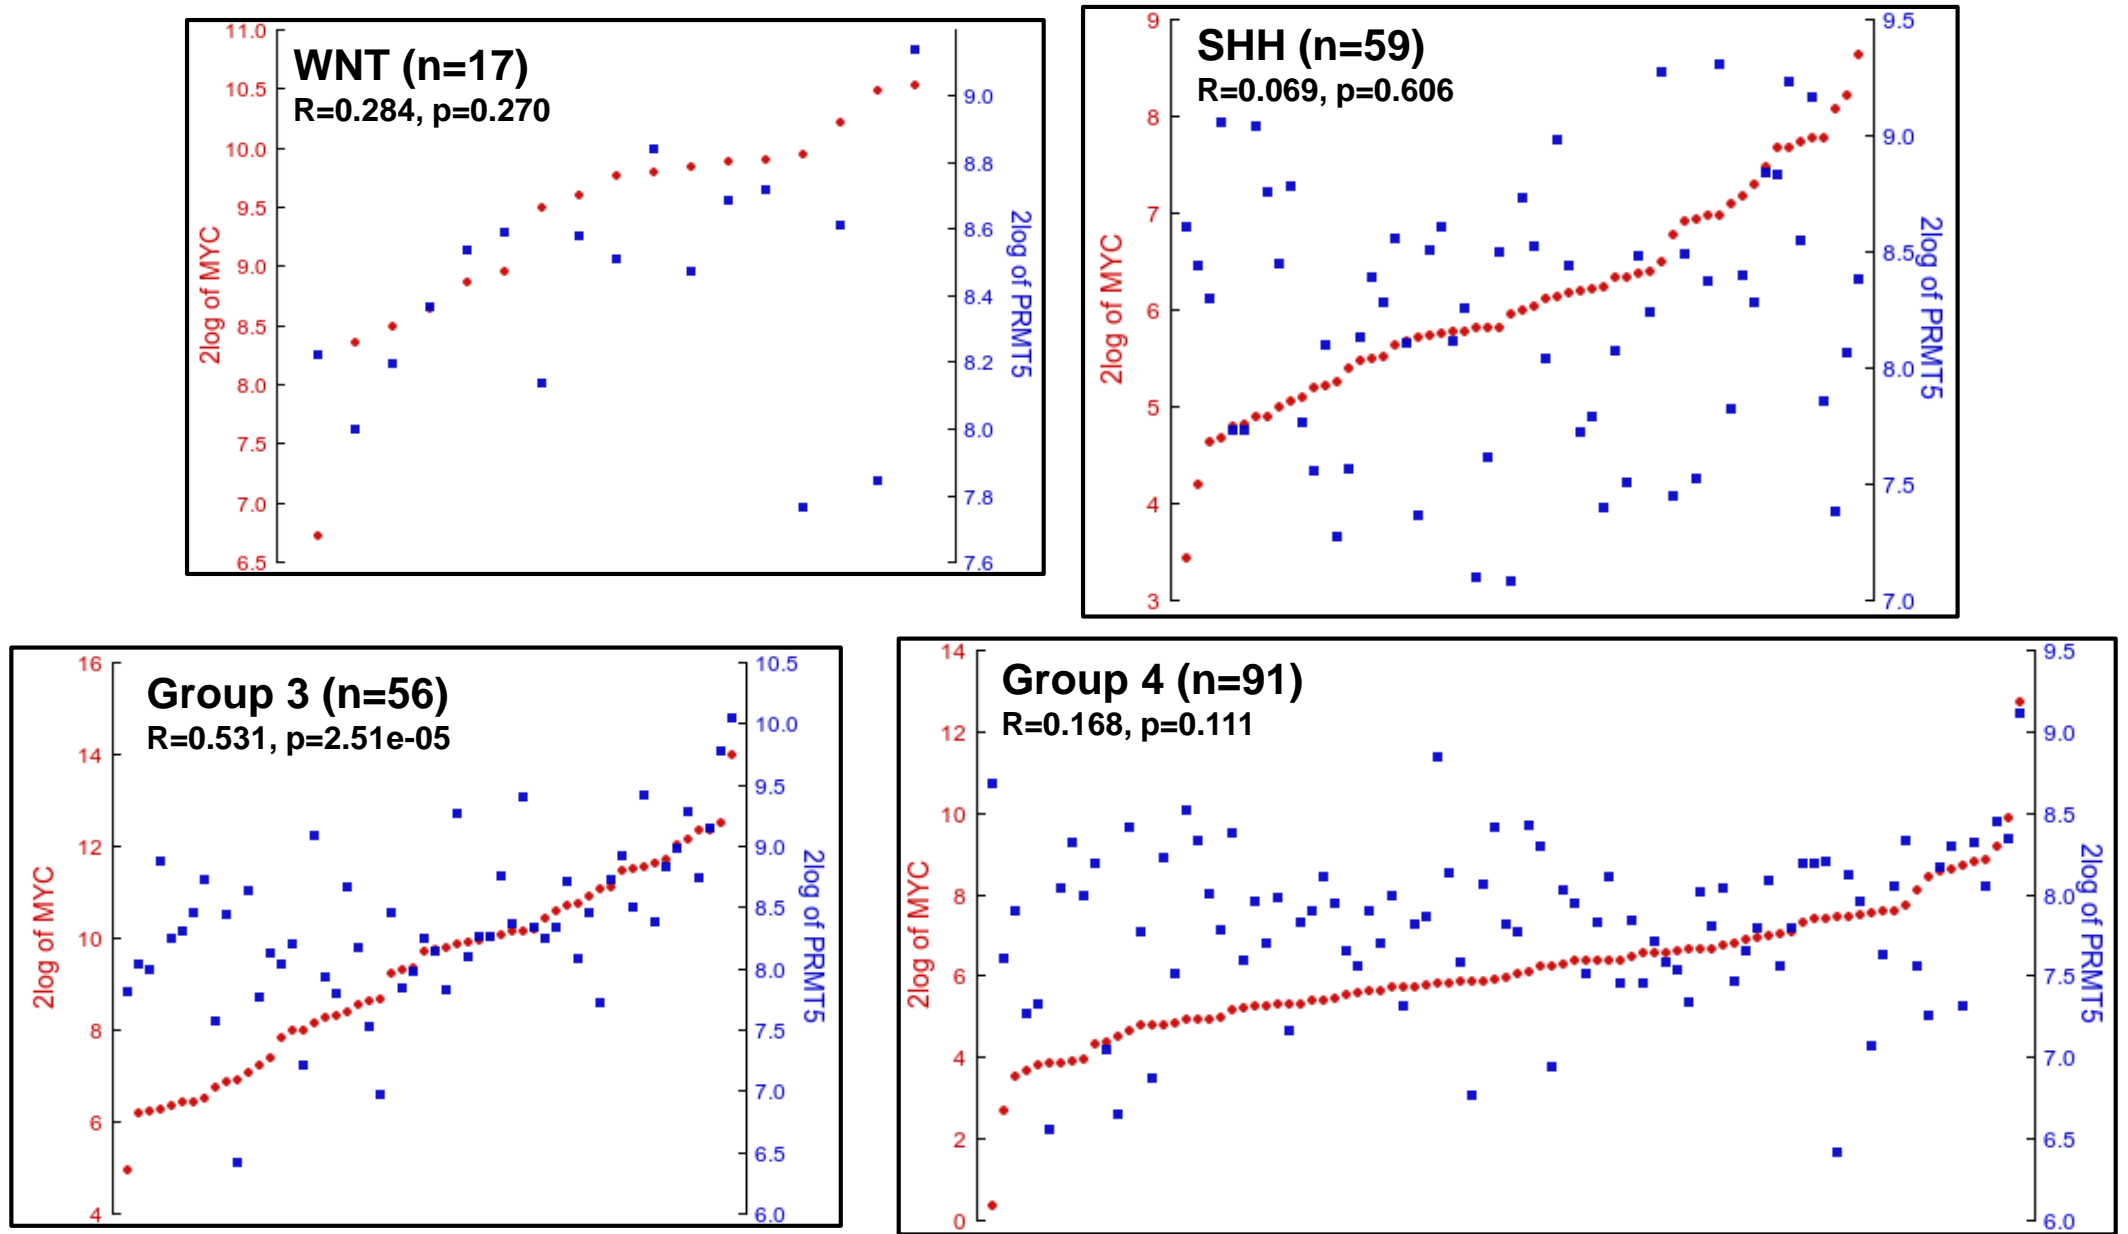

**Fig. S1.** The expression correlation of *PRMT5* gene with *MYC* gene in medulloblastoma. These data were analyzed using a Pifster (n=223) cohort at R2-Genomics platform.
